# Supplementary material
Source: PubMed Central journal article supplement (PMC2935757)

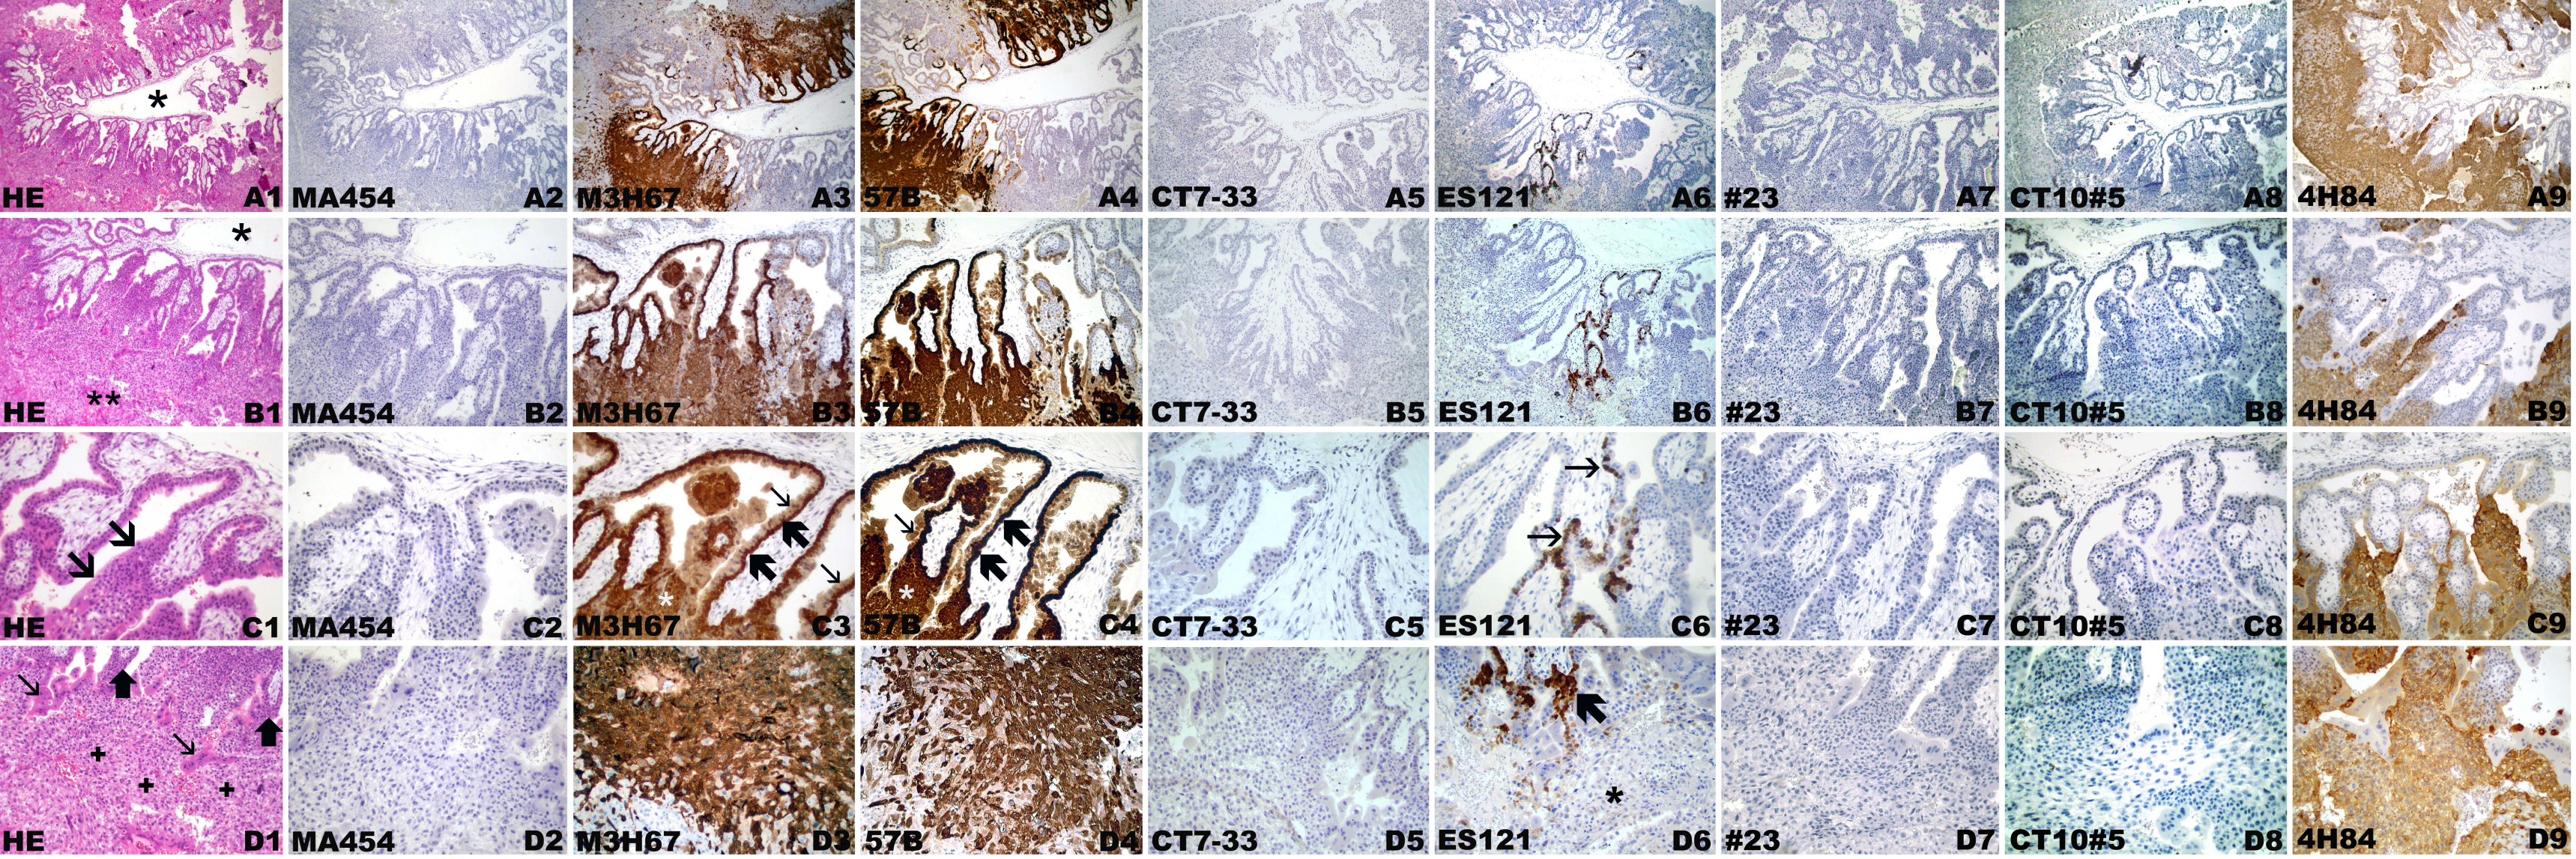

Supplement: 1424-9634-07-015-s001.pdf [file 1424-9634-07-015-s001.pdf]

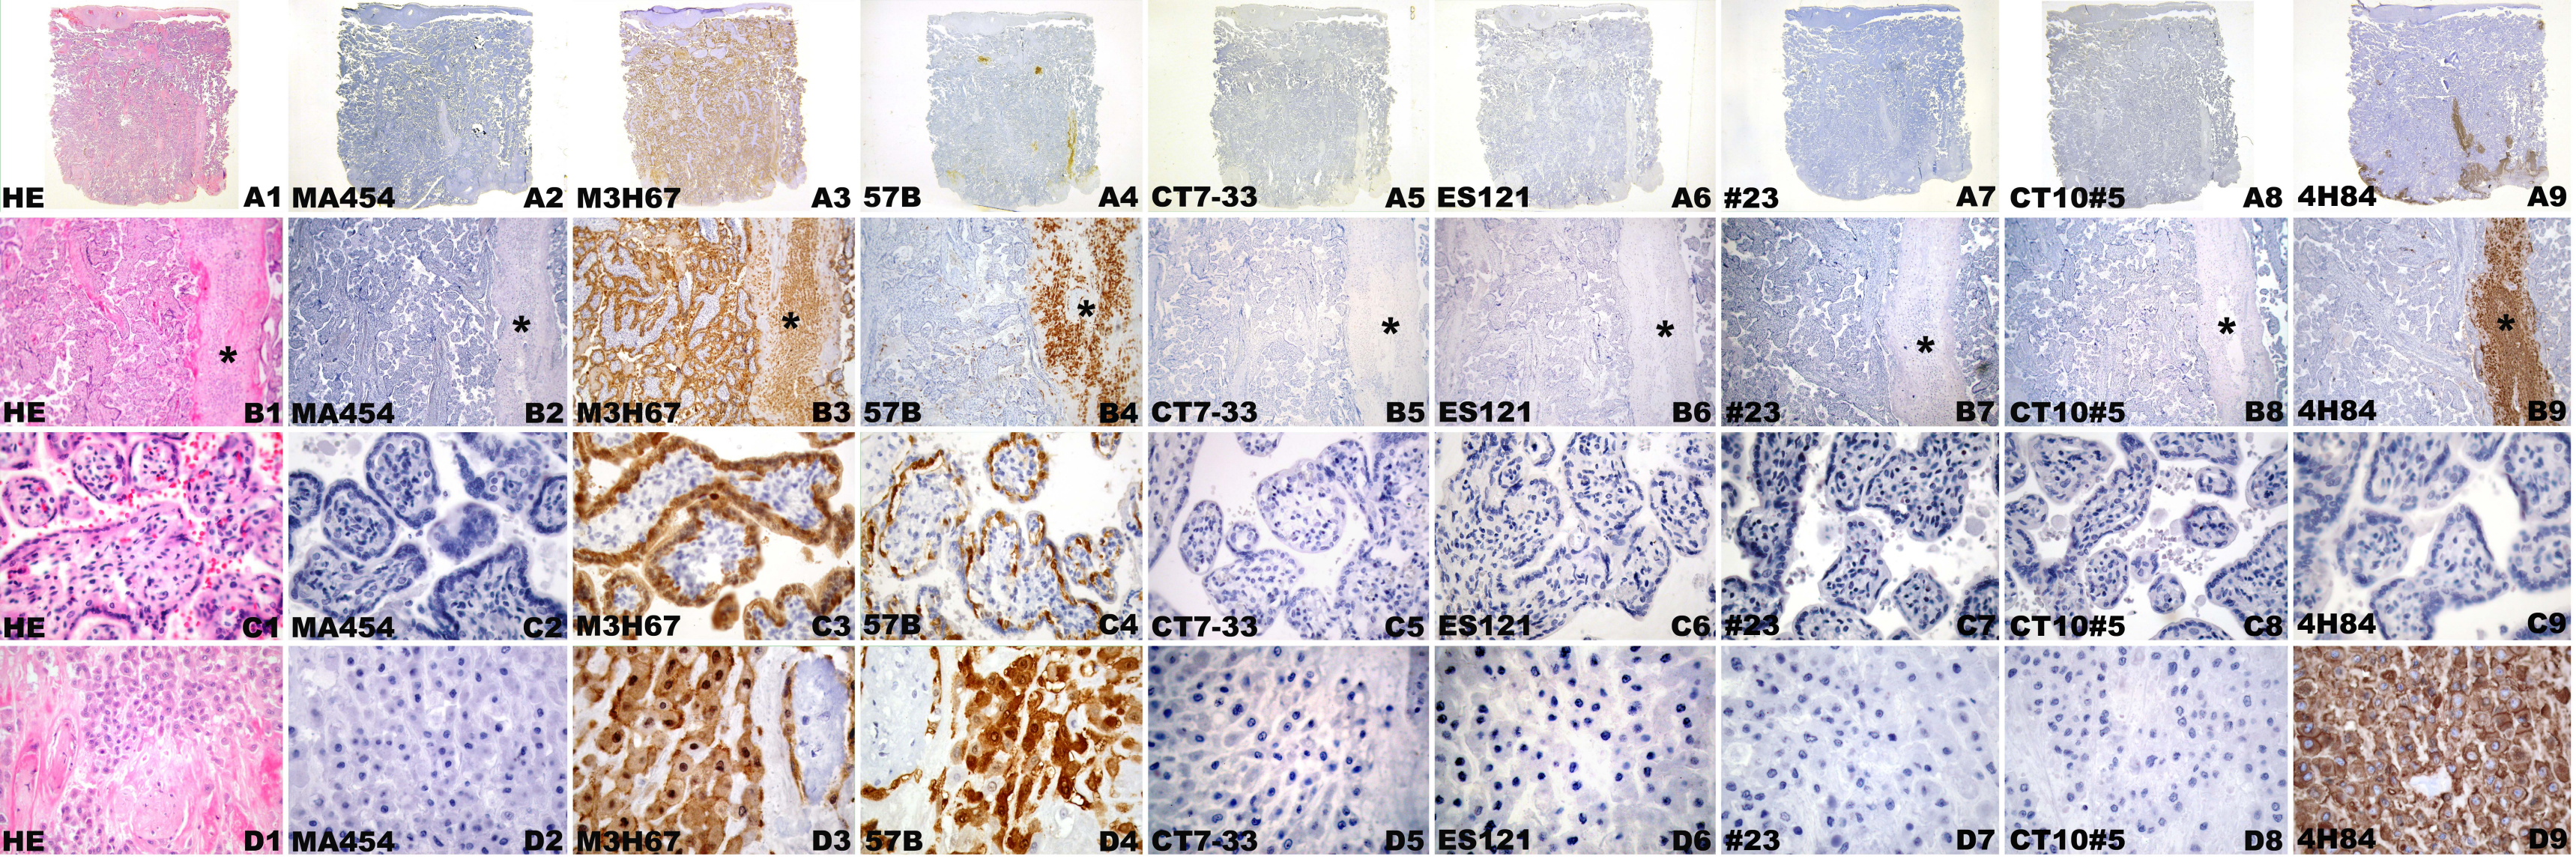

Supplement: 1424-9634-07-015-s002.pdf [file 1424-9634-07-015-s002.pdf]

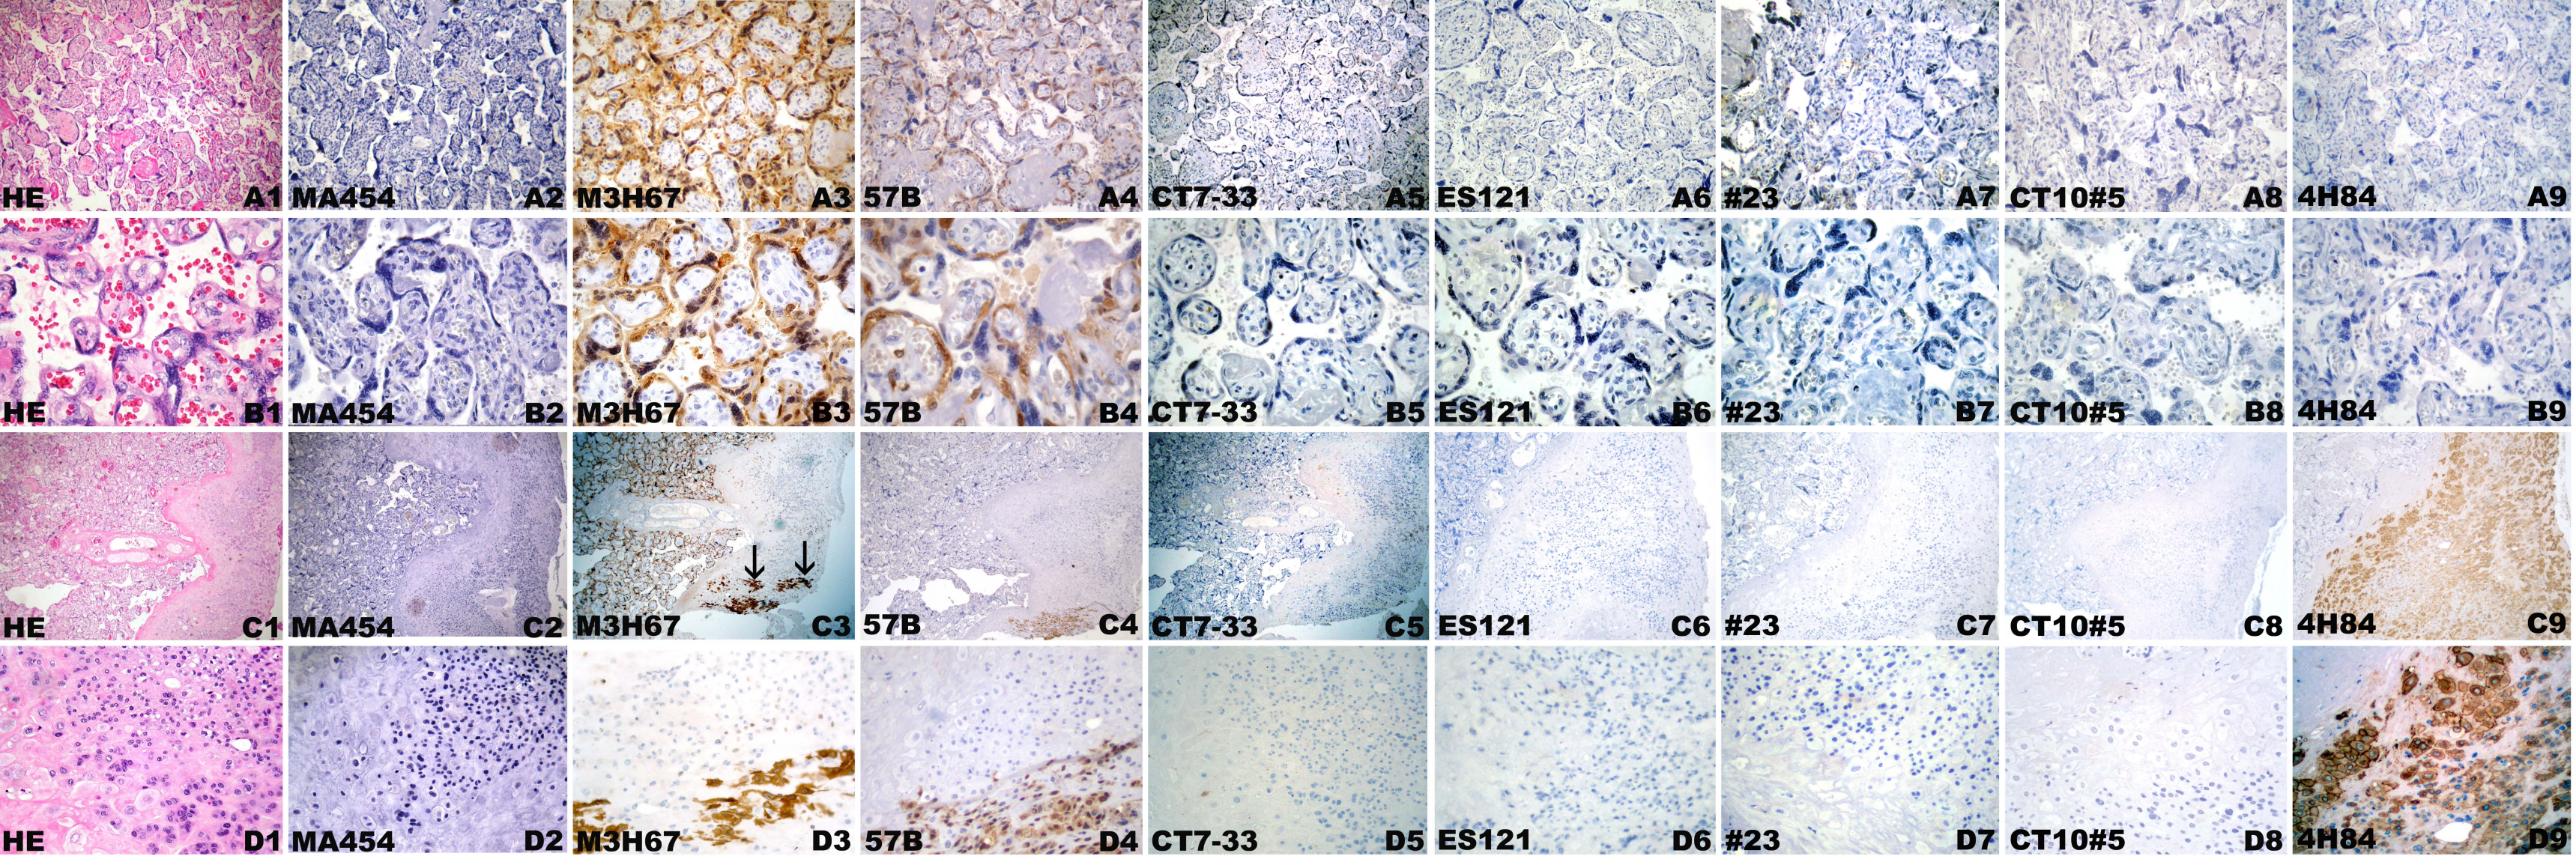

Supplement: 1424-9634-07-015-s003.pdf [file 1424-9634-07-015-s003.pdf]
